# Supplementary material for: Molecular dynamics and principal components of potassium binding with human telomeric intra-molecular G-quadruplex
Source: PubMed Central journal article supplement (PMC4444812; doi:10.1007/s13238-015-0155-3), 2015-04-18
Supplement: 13238_2015_155_MOESM1_ESM.pdf [file 13238_2015_155_MOESM1_ESM.pdf]

# Molecular Dynamics and Principal Components of Potassium Binding with Human Telomeric Intra-molecular G-Quadruplex

Zhiguo Wang <sup>\*,1</sup>, Ruping Chen <sup>1,2</sup>, Ling Hou <sup>1</sup>, Jianfeng Li <sup>1</sup>, Jun-Ping Liu <sup>\*,1,2,3,4</sup>

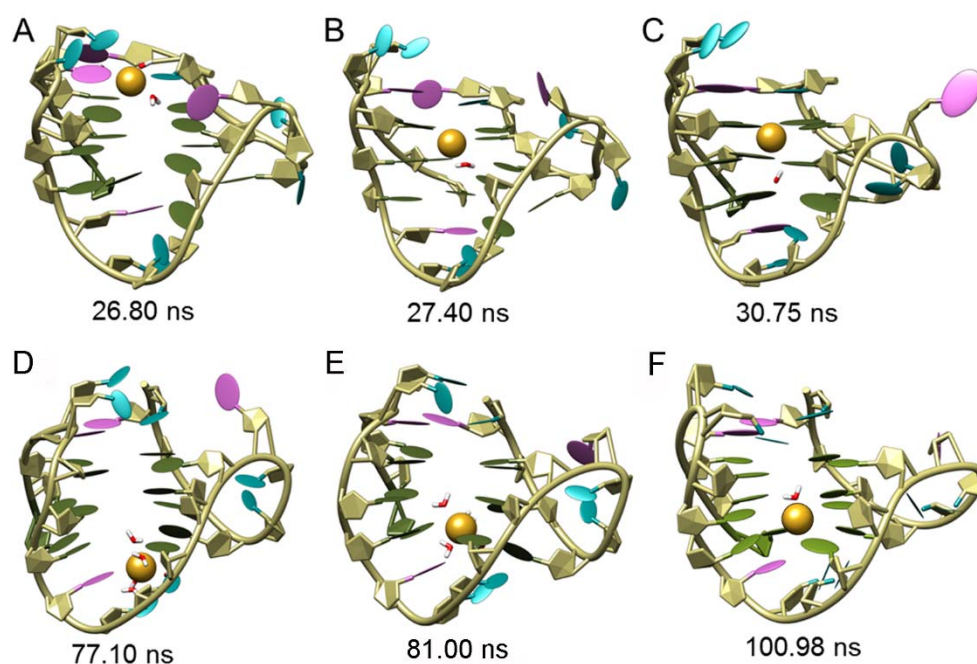

**Figure S1**

**Binding processes of Na<sup>+</sup> ions with human telomeric hybrid [3+1] form-one G-quadruplex.** Figures (A)-(C) represent the binding process through the top pathway in sim-Na1; (D)-(F) represent the binding process through the bottom pathway in sim-Na2. The bases of adenine, thymine and guanine nucleotides were colored orchid, cyan and olive green, respectively; the Na<sup>+</sup> ions were represented as yellow spheres.

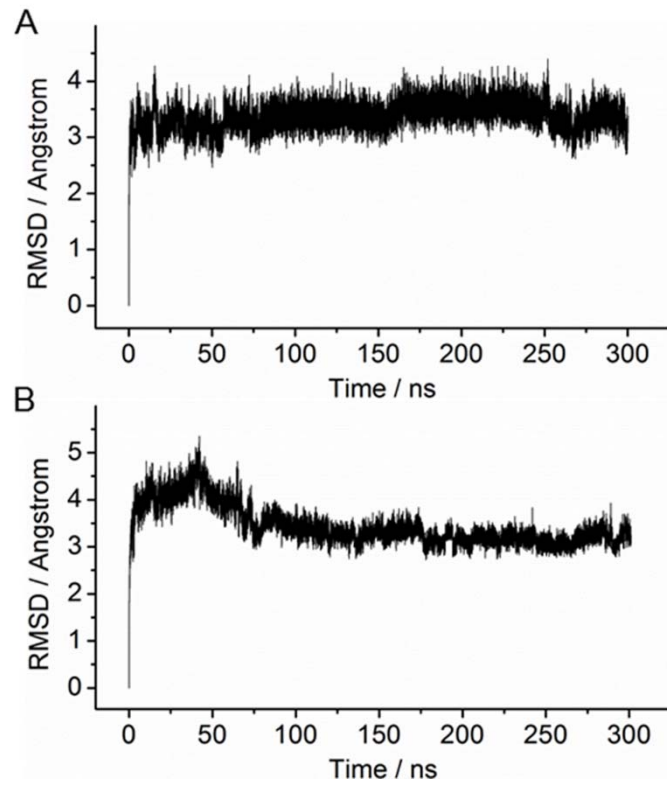

**Figure S2**

**The RMSDs of human hybrid [3+1] form-one G-quadruplex in Na<sup>+</sup> containing solutions.** (A) and (B) presented the RMSD values of sim-Na1 and sim-Na2, respectively.

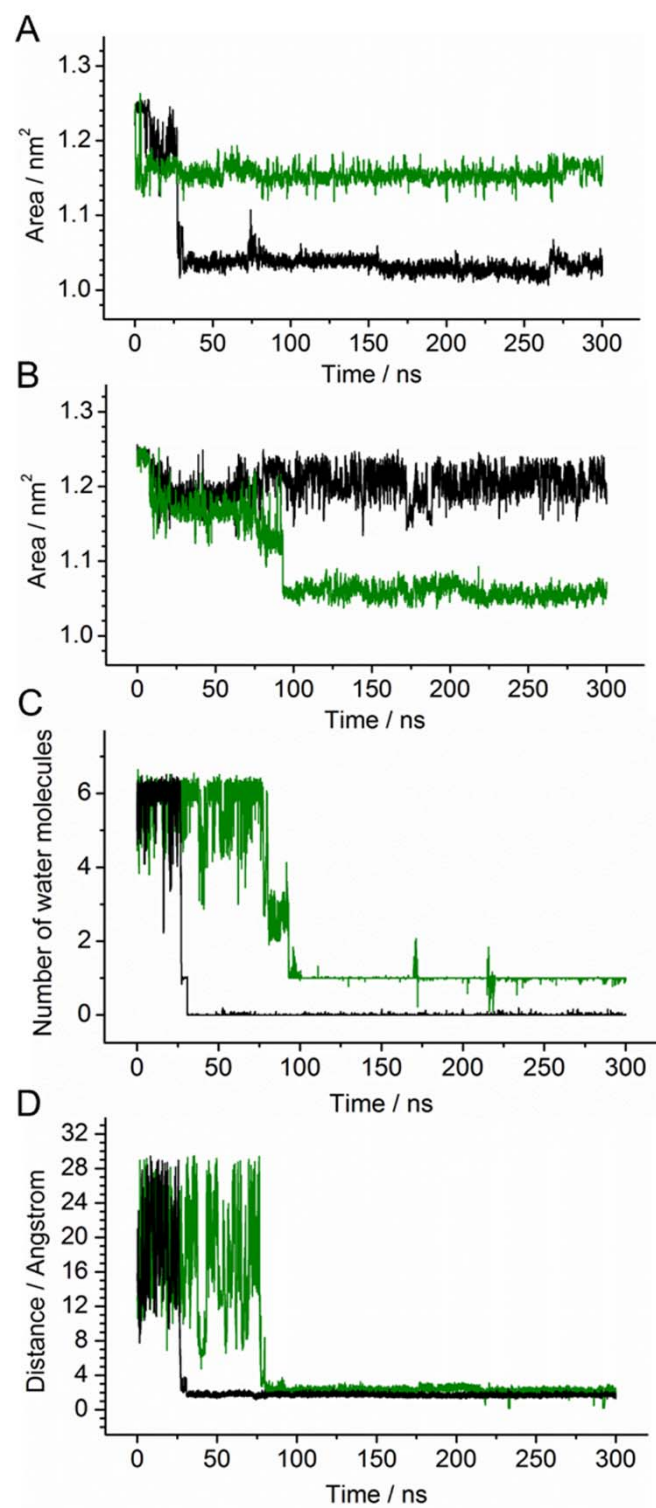

**Figure S3**

**The variations of G-tetrad gate areas, coordinated waters and distances in the simulations of sim-Na1 and sim-Na2. (A) and (B) respectively showed the changes**

of G-tetrad gate areas of sim-Na1 and sim-Na2, in which the top and bottom areas were colored black and green, respectively; (C) and (D) respectively presented the number of waters within 3.5 Å of binding Na<sup>+</sup> ions and the distances between the binding Na<sup>+</sup> ions and CCG in sim-Na1 (black) and sim-Na2 (green).
